# Supplementary material for: Luminescence and stability of Tb doped CaF2 nanoparticles
Source: Royal Society of Chemistry journal article supplement (doi:10.1039/d2ra07897j), 2023-01-01
Supplement: d2ra07897j1.pdf [file d2ra07897j1.pdf]

## Luminescence and stability of Tb doped CaF<sub>2</sub> nanoparticles

*E. H. H. Hasabeldaim\**, *H. C. Swart* and *R. E. Kroon\**

*Department of Physics, University of the Free State, Bloemfontein, 9300, South Africa*

Department of Physics, University of the Free State, PO Box 339, Bloemfontein, 9300, South Africa.

\*E-mail addresses: omda180@gmail.com (E. H. H. Hasabeldaim) and KroonRE@ufs.ac.za (R. E. Kroon).

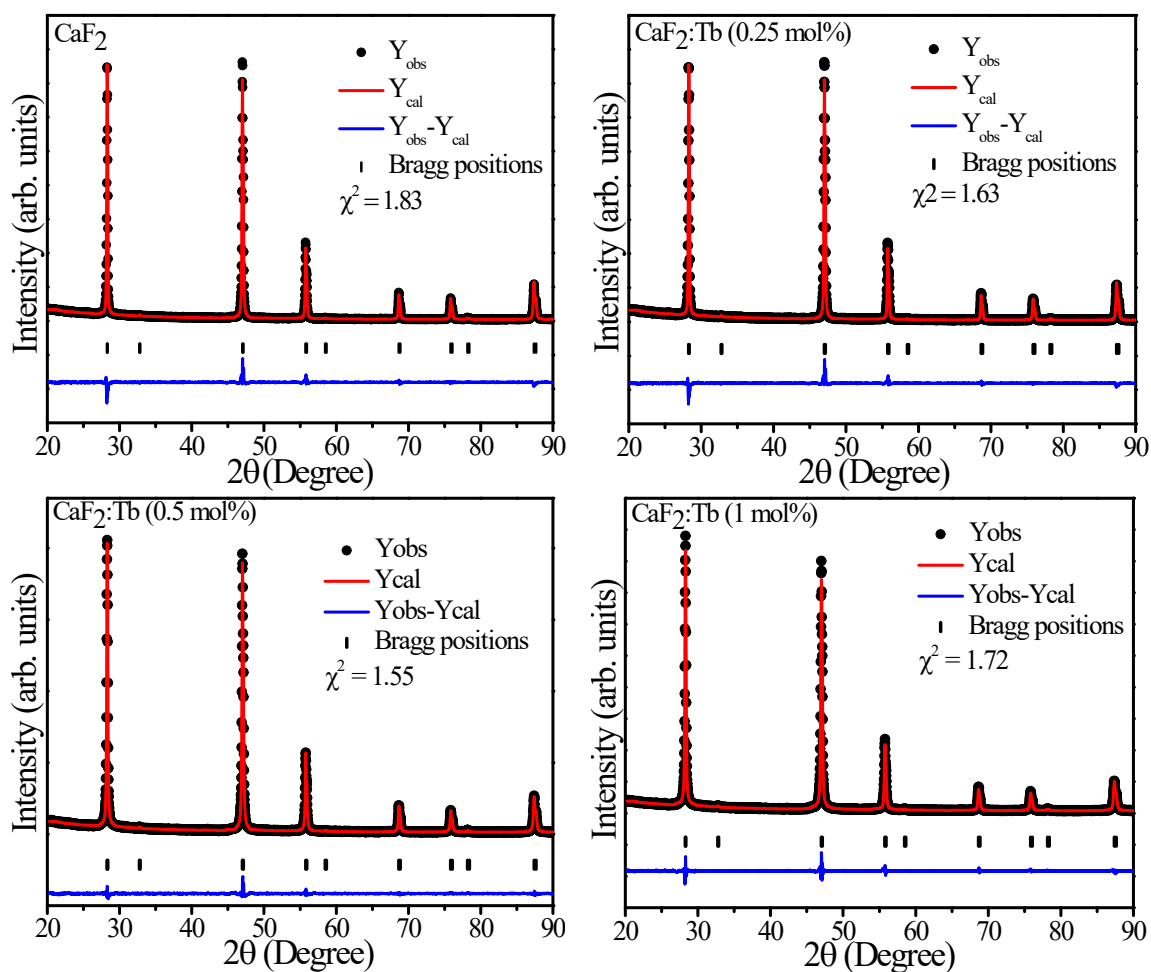

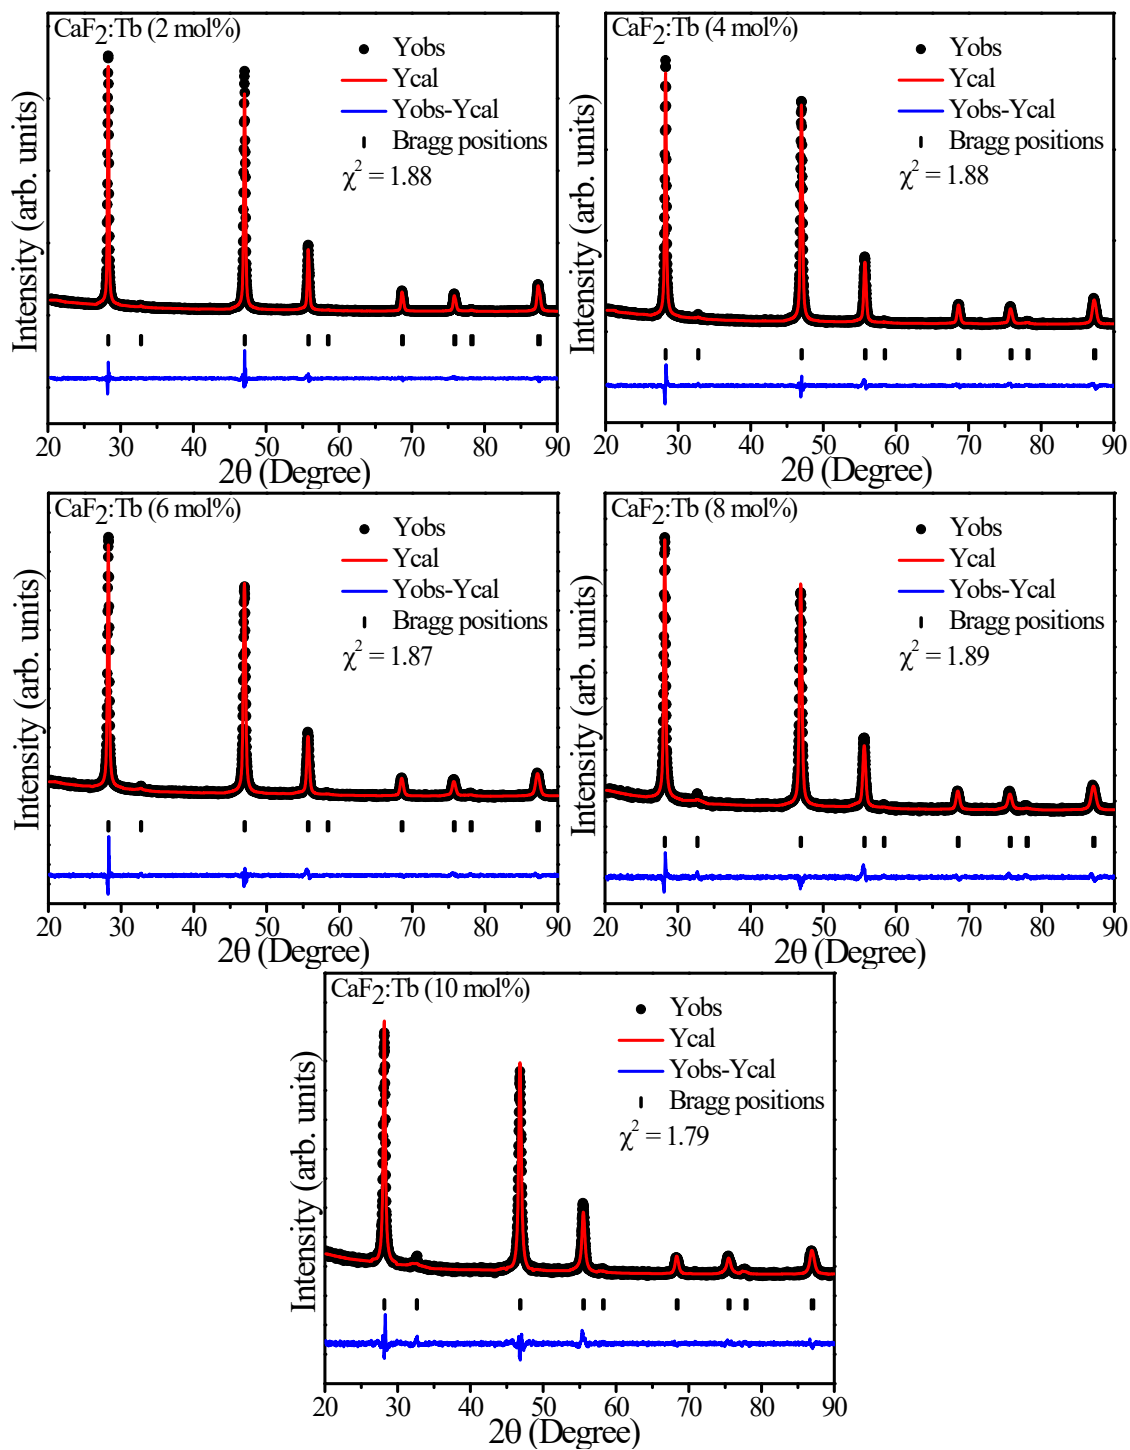

Figure S1. Rietveld refinement of the XRD patterns of  $\text{CaF}_2$  nanoparticles doped with different Tb concentrations.

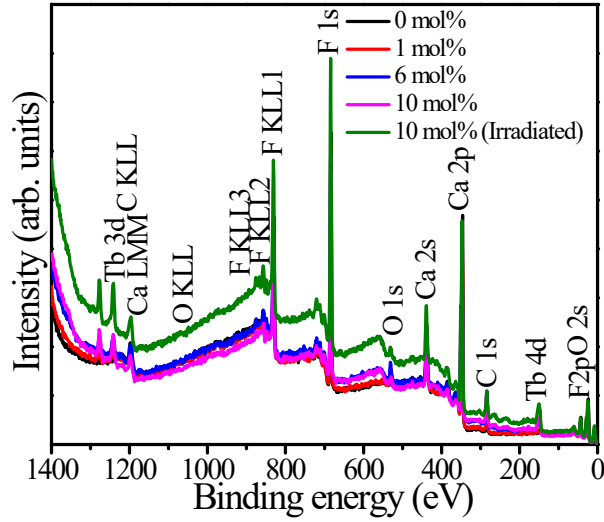

Figure S2. XPS wide survey spectra of CaF<sub>2</sub> nanoparticles doped with different Tb concentrations.

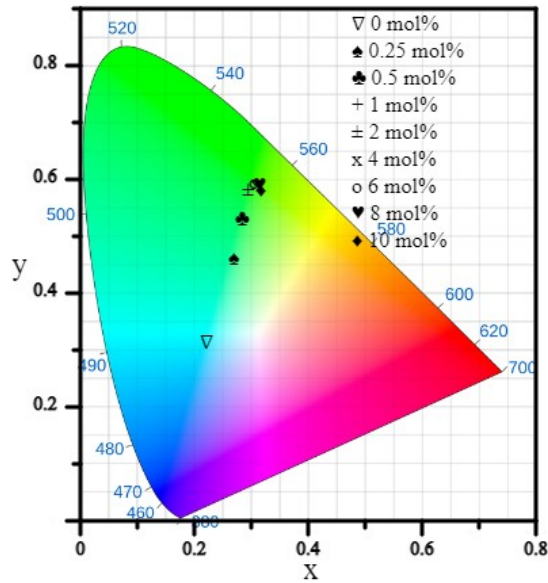

Figure S3. CIE chromaticity diagram of the CaF<sub>2</sub> samples with different Tb content.

Table S1. CIE coordinates (X and Y) and colour correlated temperature (CCT) of the CaF<sub>2</sub> samples containing different Tb concentration.

| Sample    | X    | Y    | CCT (K) |
|-----------|------|------|---------|
| 0 mol%    | 0.22 | 0.31 | 14446   |
| 0.25 mol% | 0.27 | 0.46 | 7235    |
| 0.5 mol%  | 0.28 | 0.53 | 6584    |
| 1 mol%    | 0.30 | 0.58 | 6194    |

|         |      |      |      |
|---------|------|------|------|
| 2 mol%  | 0.30 | 0.58 | 6194 |
| 4 mol%  | 0.31 | 0.59 | 5908 |
| 6 mol%  | 0.31 | 0.60 | 5960 |
| 8 mol%  | 0.31 | 0.59 | 5827 |
| 10 mol% | 0.32 | 0.58 | 5757 |
